# Supplementary material
Source: publisher site journal article supplement (https://www.dovepress.com/article/321288)

Appendix table 1.

Appendix table 1. Results of MAIC (after matching) between BAY 94-9027 and other extended half-life rFVIII products

|  | BAY 94-9027 vs rFVIIIFc [1, 2] | | | BAY 94-9027 vs BAX 855 [1, 2] | | | BAY 94-9027 vs N8-GP  (this study) | | |
| --- | --- | --- | --- | --- | --- | --- | --- | --- | --- |
|  | rFVIIIFc | BAY 94-9027 | p | BAX 855 | BAY 94-9027 | p | N8-GP | BAY 94-9027 | p |
| Mean ABR 1 | 3.90 | 3.77 | 0.87 | 3.70 | 3.95 | 0.73 | 3.70 | 4.10 | 0.45 |
| Mean/median2 annualized FVIII consumption (IU/kg/year) | 4289.08 | 3469.88 | <0.001 | 4560.41 | 3355.08 | na | 4845.0 | 3552.43 | 0.003 |
| Proportion of patients with zero bleeds | 40.7 % | 34.1 % | 0.37 | 39.6 % | 38.9 % | 0.93 | 40 % | 41 % | 0.90 |

ABR, annualized bleeding rate; na- not applicable (p-values incalculable due to unavailability of standard errors for the median consumption);

1mean ABR based on negative binomial model for comparison with rFVIIIFc and Poisson model with robust errors for N8-GP.

References

1. Batt, K., et al., *Matching-adjusted indirect comparisons of annualized bleeding rate and utilization of BAY 94-9027 versus three recombinant factor viii agents for prophylaxis in patients with severe hemophilia a.* Journal of Blood Medicine, 2019. **10**: p. 147-159.

2. Batt, K., et al., *INDIRECT COMPARISON OF ANNUALISED BLEEDING RATE AND ANNUAL CONSUMPTION BETWEEN EXTENDED HALF-LIFE RFVIII PRODUCTS SHOWS DIFFERENCES IN CONSUMPTION WITH SIMILAR OUTCOME.* Haemophilia, 2021. **27**(S2): p. 91-92.

Appendix figure 1. Infographic of matching adjusted indirect comparison – the idea of the method.


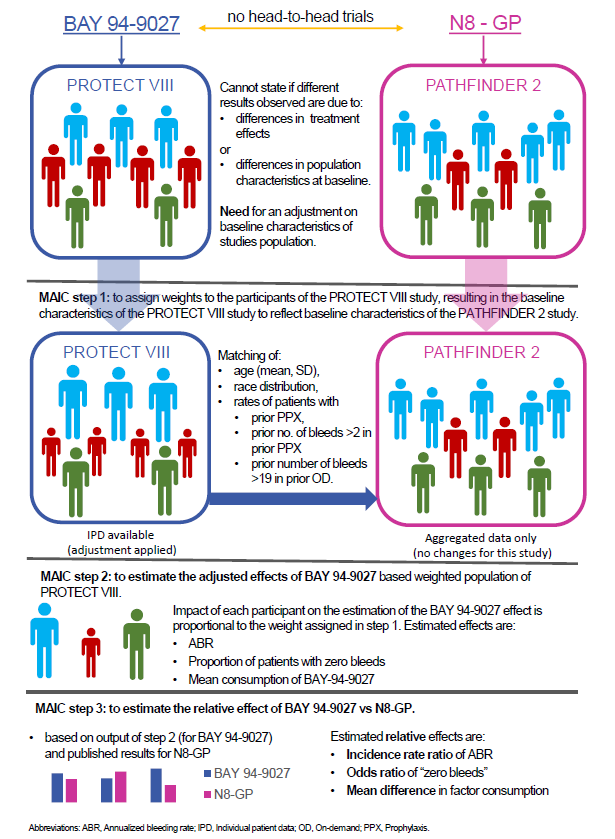

Supplement: Supplementary file 1 [file get_supplementary_file.php]
